# Supplementary material for: Partial Agonistic Actions of Sex Hormone Steroids on TRPM3 Function
Source: MDPI journal article supplement (doi:10.3390/ijms222413652), 2021-12-20
Supplement: s1 [file s1]

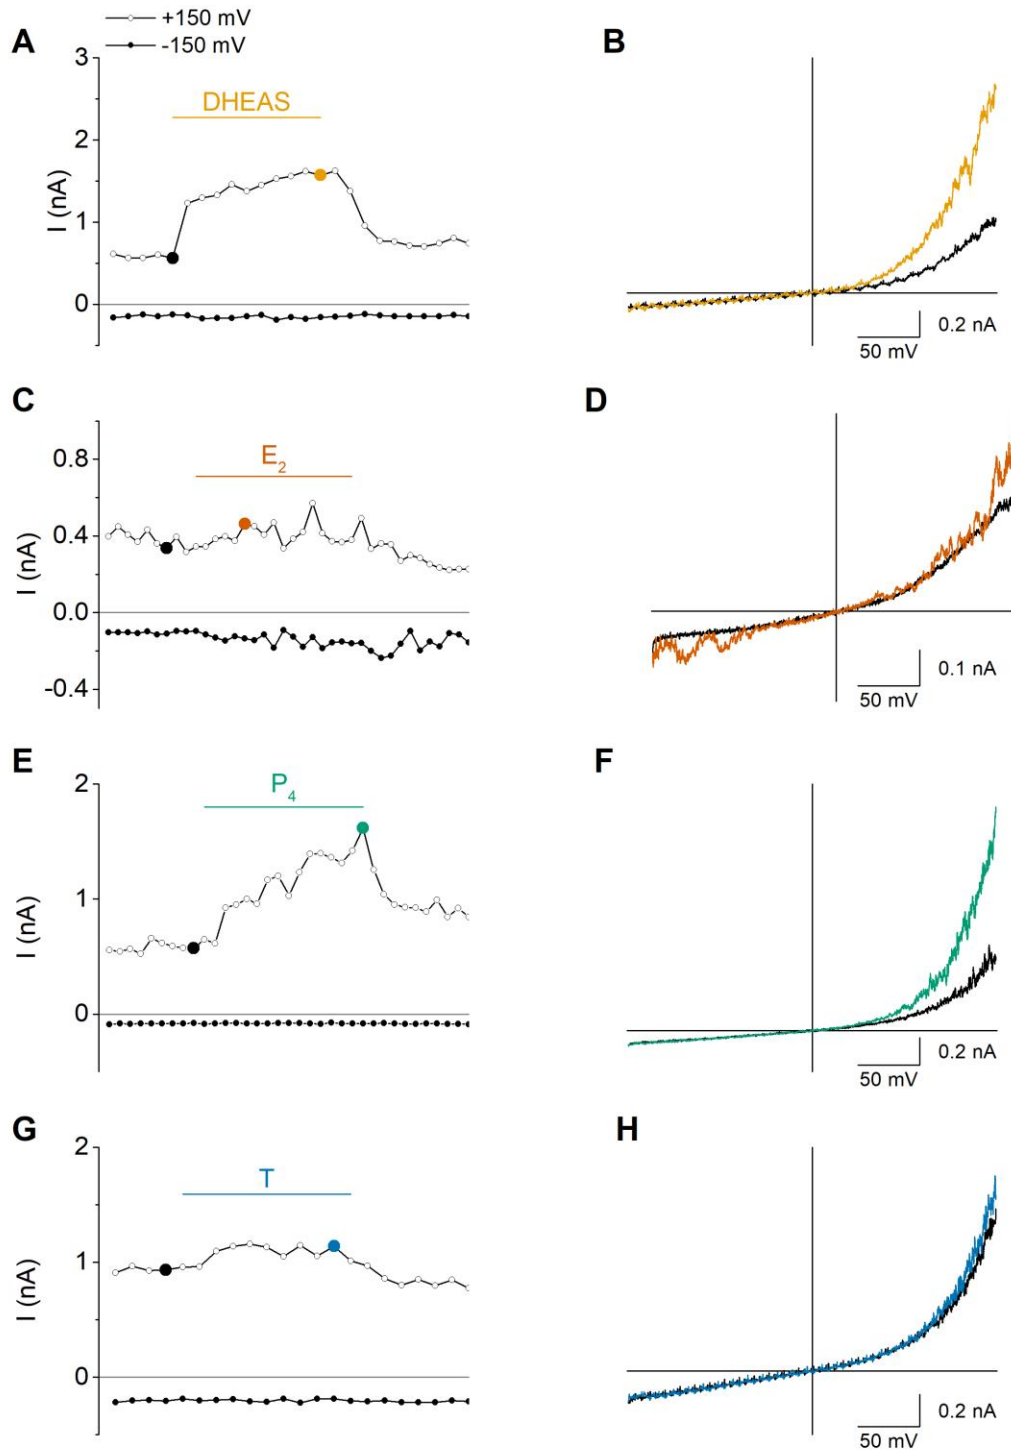

**Figure S1.** Patch clamp data show effect of direct application of (precursor) sex hormones on TRPM3 activity. (A, C, E, G) Time course of patch clamp experiments on HEK-TRPM3 $\alpha$ 2 cells, upon application of 100  $\mu$ M DHEAS, E<sub>2</sub>, P<sub>4</sub>, and T, respectively. (B, D, F, H) Corresponding I-V curve of the indicated points in (A, C, E, G).

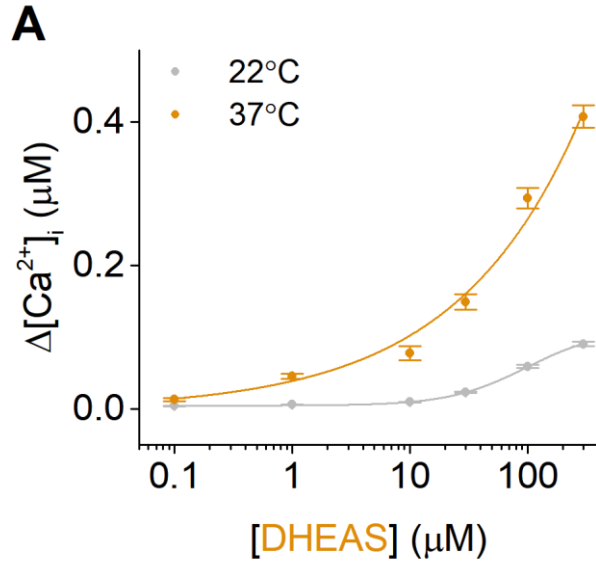

**Figure S2.** Effect of DHEAS on human TRPM3 isoform. **(A)** Concentration-response curves of DHEAS at 23°C (N = 4, n = 578) and 37°C (N = 3, n = 346). Data are represented as mean ± SEM.

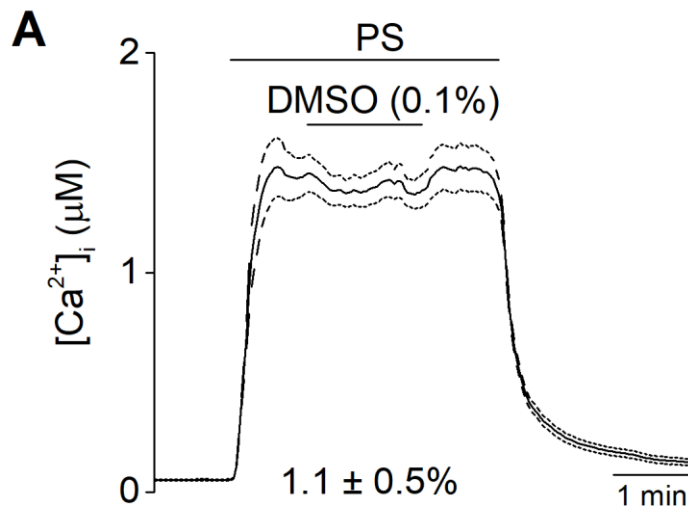

**Figure S3.** DMSO (0.1%) has no clear effect on PS-induced TRPM3 responses. **(A)** Time course of intracellular calcium concentrations ( $[Ca^{2+}]_i$ ) of HEK-TRPM3 cells upon application of 40  $\mu$ M PS, followed by a co-administration with 0.1% DMSO. No inhibitory effect could be detected during DMSO administration (N = 3, n = 707). Data are represented as mean ± SEM.

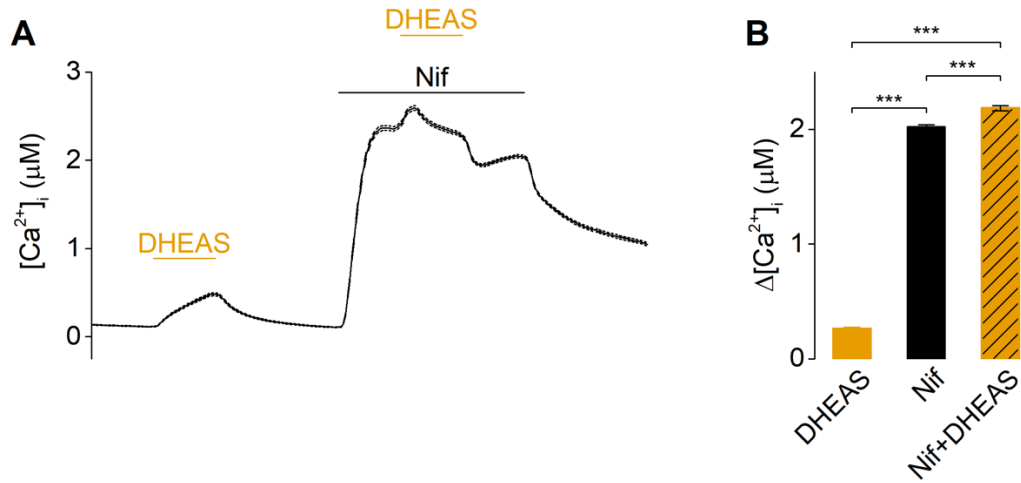

**Figure S4.** DHEAS does not exhibit antagonistic effects on nifedipine-induced TRPM3 activity. **(A)** Time course of intracellular calcium concentrations ( $[Ca^{2+}]_i$ ) of HEK-TRPM3 cells upon application of 100  $\mu M$  DHEAS, 50  $\mu M$  nifedipine (Nif) or co-application of DHEAS and Nif ( $N = 3$ ,  $n = 763$ ). **(B)** Corresponding amplitudes of the calcium imaging experiment. Data are represented as mean  $\pm$  SEM. Statistical analysis using a Kruskal-Wallis test and a Dunn's multiple comparisons posthoc test,  $p < 0.05$  \*,  $p < 0.01$  \*\*. P values for DHEAS/Nif, DHEAS/Nif+DHEAS and Nif/Nif+DHEAS:  $p < 1 \times 10^{-15}$ .

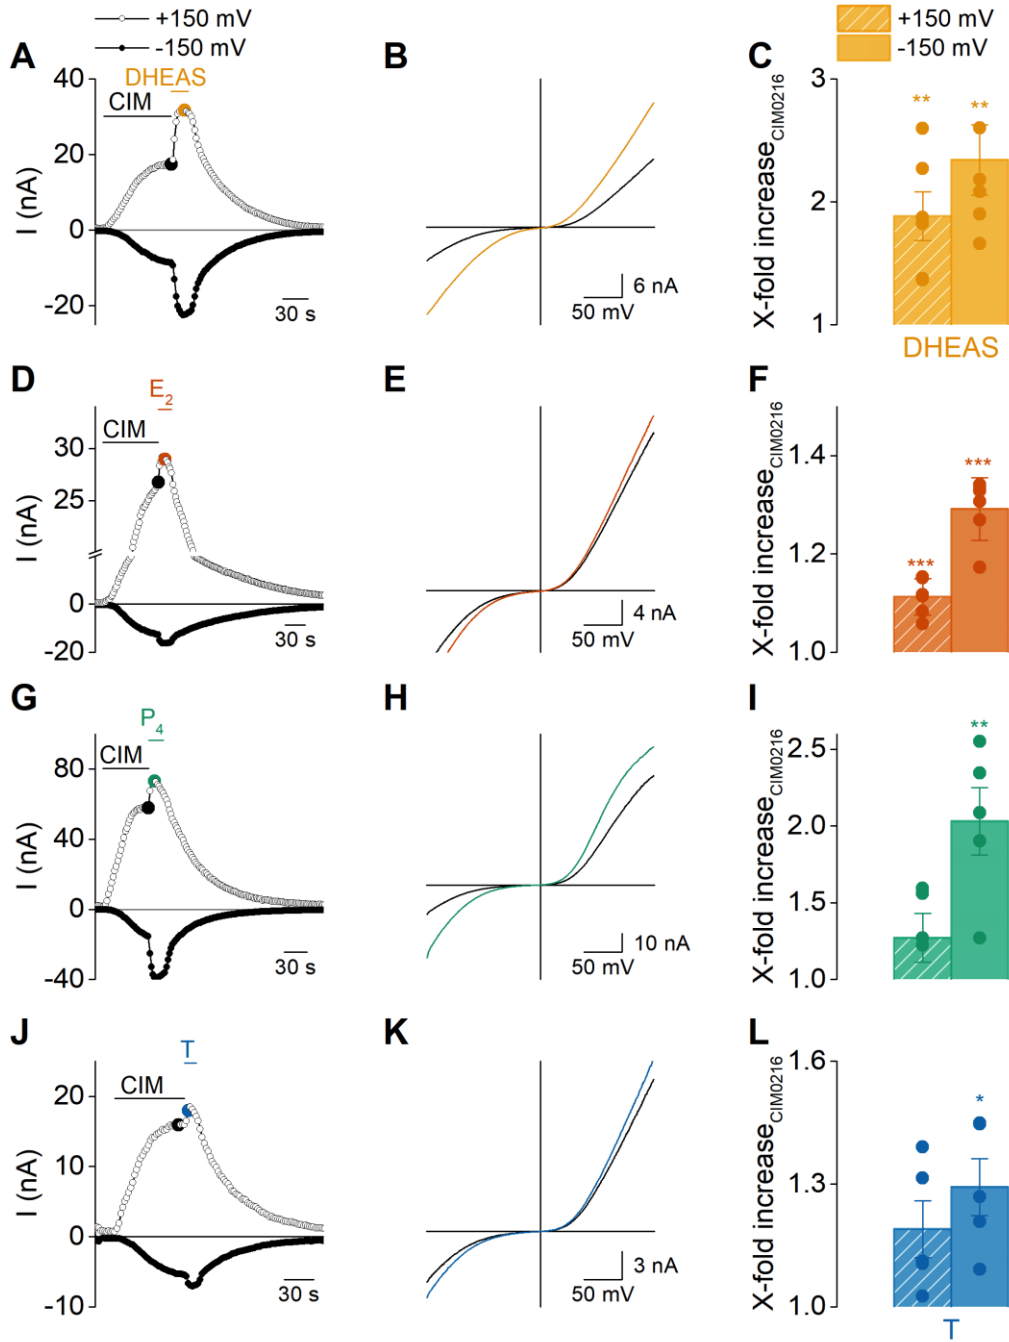

**Figure S5.** Potentiation of CIM0216 responses by DHEAS, estradiol, progesterone, and testosterone. (A, D, G, J) Time course of patch clamp experiments on HEK-TRPM3α2 cells upon application of 1 μM CIM0216, followed by an application of 100 μM DHEAS, E<sub>2</sub>, P<sub>4</sub>, and T, respectively. (B, E, H, K) The corresponding I-V curve of the indicated points in (A, D, G, J) after stimulation with DHEAS, E<sub>2</sub>, P<sub>4</sub>, and T, respectively. (C, F, I, L) X-fold potentiation of currents in presence of CIM0216 at -150 mV (shaded) and +150 mV for DHEAS (n = 6), E<sub>2</sub> (n = 6), P<sub>4</sub> (n = 5), and T (n = 5), respectively. Data are represented as mean ± SEM. Statistical analysis using a One Sample t-tests, p<0.05 \*, p<0.01 \*\*. P values for (C): +150 mV: p = 0.0068 and -150 mV: p = 0.0054; (F): +150 mV: p = 0.0007 and -150 mV: p = 0.0001; (I): +150 mV: p = 0.164 and -150 mV: p = 0.0094; (L): +150 mV: p = 0.052 and -150 mV: p = 0.0135.

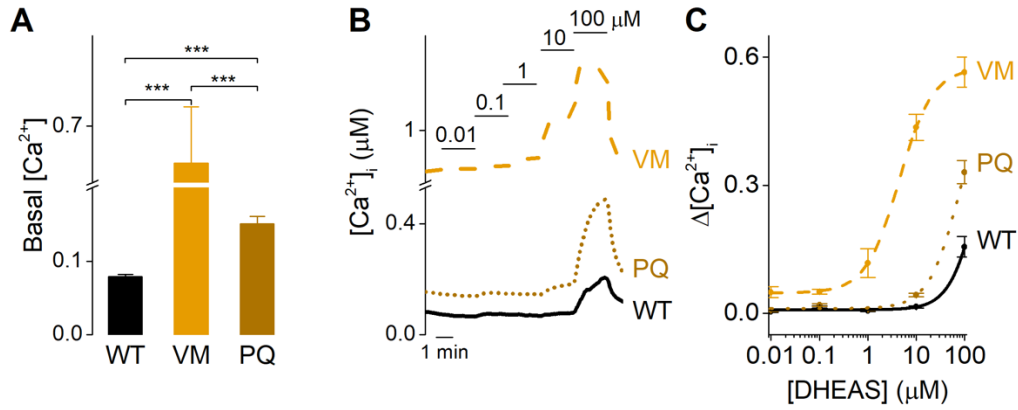

**Figure S6.** TRPM3 mutants showed an increased sensitivity to DHEAS. (A) Basal calcium concentrations of the V990M (VM) (N = 3, n = 314) and P1090Q (PQ) (N = 3, n = 294) TRPM3 variant are significantly increased compared to the wild type (WT) (N = 3, n = 184). (B) Time course of DHEAS concentration-response recordings in calcium imaging experiments on wild type (N = 3, n = 184), V990M (N = 3, n = 314) or P1090Q (N = 3, n = 294) HEK\_hTRPM3YFP cells. (C) Concentration-response curves of DHEAS in wild type, V990M or P1090Q HEK\_hTRPM3YFP cells. Data are represented as mean  $\pm$  SEM. Statistical analysis using a Kruskal-Wallis test,  $p < 0.05$  \*,  $p < 0.001$  \*\*\*. P values for (A): WT/VM:  $p < 1 \times 10^{-15}$ , WT/PQ:  $p = 6.9 \times 10^{-13}$ , VM/PQ:  $p = 1.5 \times 10^{-7}$ .
